# Supplementary material for: Carbon quantum dots with photo-generated proton property as efficient visible light controlled acid catalyst
Source: Royal Society of Chemistry journal article supplement (doi:10.1039/c3nr03996j), 2013-10-22
Supplement: c3nr03996j.pdf [file c3nr03996j.pdf]

# Carbon Quantum Dots with Photo-generated Proton Property as Efficient Visible Light Controlled Acid Catalyst

Haitao Li,<sup>‡</sup> Ruihua Liu,<sup>‡</sup> Weiqian Kong, Yang Liu,<sup>\*</sup> Juan Liu, Lei Zhou, Xing Zhang, Shuit-Tong Lee, Zhenhui Kang<sup>\*</sup>

## Supporting Information

| Entry | Reactants 1                                                                         | Reactants 2                                                                         | Products                                                                            | Conv. [%] (CQDs, 1-4 nm) (light, +/-) | Conv. [%] (Graphite, 100-2000 nm) (light, +) |
|-------|-------------------------------------------------------------------------------------|-------------------------------------------------------------------------------------|-------------------------------------------------------------------------------------|---------------------------------------|----------------------------------------------|
| 1     | CH <sub>3</sub> OH                                                                  | CH <sub>3</sub> COOH                                                                | CH <sub>3</sub> COOCH <sub>3</sub>                                                  | 6.7/2.6                               | 0.8                                          |
| 2     |    | CH <sub>3</sub> COOH                                                                |    | 6.8/1.9                               | 0.2                                          |
| 3     | C <sub>2</sub> H <sub>5</sub> OH                                                    | CH <sub>3</sub> COOH                                                                | CH <sub>3</sub> COOC <sub>2</sub> H <sub>5</sub>                                    | 7.7/2.9                               | 0.4                                          |
| 4     | C <sub>2</sub> H <sub>5</sub> OH                                                    |    |    | 6.3/1.3                               | 0.3                                          |
| 5     | CH <sub>3</sub> OH                                                                  |  |  | 6.5/1.9                               | 0.8                                          |
| 6     |  |  |  | 6.1/1.1                               | 0.5                                          |
| 7     |  | CH <sub>3</sub> COOH                                                                |  | 6.8/2.8                               | 0.1                                          |
| 8     |  | CH <sub>3</sub> COOH                                                                |  | 7.9/2.9                               | 0.9                                          |
| 9     |  |  |  | 6.7/2.6                               | 0.1                                          |
| 10    |  |  |  | 6.9/1.8                               | 0.3                                          |

**Table S1** Photocatalytic activities for different reactions (Esterification, Peckmann and aldol condensation reaction) by 1-4 nm CQDs and graphite photocatalysts with (+) or without (-) visible light ( $\lambda > 420$  nm).

| Entry | Reactants                                                                         |                                                                                   | Products                                                                          | Conv. [%]       |                  |
|-------|-----------------------------------------------------------------------------------|-----------------------------------------------------------------------------------|-----------------------------------------------------------------------------------|-----------------|------------------|
|       | 1                                                                                 | 2                                                                                 |                                                                                   | (GO) (light, +) | (RGO) (light, +) |
| 1     | CH <sub>3</sub> OH                                                                | CH <sub>3</sub> COOH                                                              | CH <sub>3</sub> COOCH <sub>3</sub>                                                | 10.8            | 3.2              |
| 2     | CH <sub>3</sub> OH                                                                |  |  | 9.5             | 2.9              |
| 3     |  |  |  | 10.6            | 2.3              |
| 4     |  |  |  | 9.3             | 2.1              |

**Table S2** Photocatalytic activities for different reactions (Esterification, Peckmann and aldol condensation reaction) by GO and RGO with (+) visible light ( $\lambda > 420$  nm).

| Entry | Reactants                                                                           |                                                                                     | Products                                                                            | Conv. [%]<br>(chemical reduced 5-10 nm CQDs) |
|-------|-------------------------------------------------------------------------------------|-------------------------------------------------------------------------------------|-------------------------------------------------------------------------------------|----------------------------------------------|
|       | 1                                                                                   | 2                                                                                   |                                                                                     |                                              |
| 1     | CH <sub>3</sub> OH                                                                  | CH <sub>3</sub> COOH                                                                | CH <sub>3</sub> COOCH <sub>3</sub>                                                  | 8.9                                          |
| 2     |  | CH <sub>3</sub> COOH                                                                |  | 7.2                                          |
| 3     | C <sub>2</sub> H <sub>5</sub> OH                                                    | CH <sub>3</sub> COOH                                                                | CH <sub>3</sub> COOC <sub>2</sub> H <sub>5</sub>                                    | 8.8                                          |
| 4     | C <sub>2</sub> H <sub>5</sub> OH                                                    |  |  | 8.1                                          |
| 5     | CH <sub>3</sub> OH                                                                  |  |  | 7.6                                          |
| 6     |  |  |  | 6.8                                          |
| 7     |  | CH <sub>3</sub> COOH                                                                |  | 9.8                                          |
| 8     |  | CH <sub>3</sub> COOH                                                                |  | 9.2                                          |
| 9     |  |  |  | 8.1                                          |
| 10    |  |  |  | 8.4                                          |

**Table S3** Photocatalytic activities for different reactions (Esterification, Peckmann and aldol condensation reaction) by chemical reduced 5-10 nm CQDs photocatalyst with visible light ( $\lambda > 420$  nm).

| Entry | Reactants 1                                                                       | Reactants 2                                                                       | Products                                                                          | Conv.[%] (CQDs after plasma treatment) (light,+) |
|-------|-----------------------------------------------------------------------------------|-----------------------------------------------------------------------------------|-----------------------------------------------------------------------------------|--------------------------------------------------|
| 1     | CH <sub>3</sub> OH                                                                | CH <sub>3</sub> COOH                                                              | CH <sub>3</sub> COOCH <sub>3</sub>                                                | 5.8                                              |
| 2     | CH <sub>3</sub> OH                                                                |  |  | 6.5                                              |
| 3     |  |  |  | 8.6                                              |
| 4     |  |  |  | 6.3                                              |

**Table S4** Photocatalytic activities for different reactions (Esterification, Peckmann and aldol condensation reaction) by 5-10nm CQDs (after plasma treatment) with (+) visible light ( $\lambda > 420$  nm).

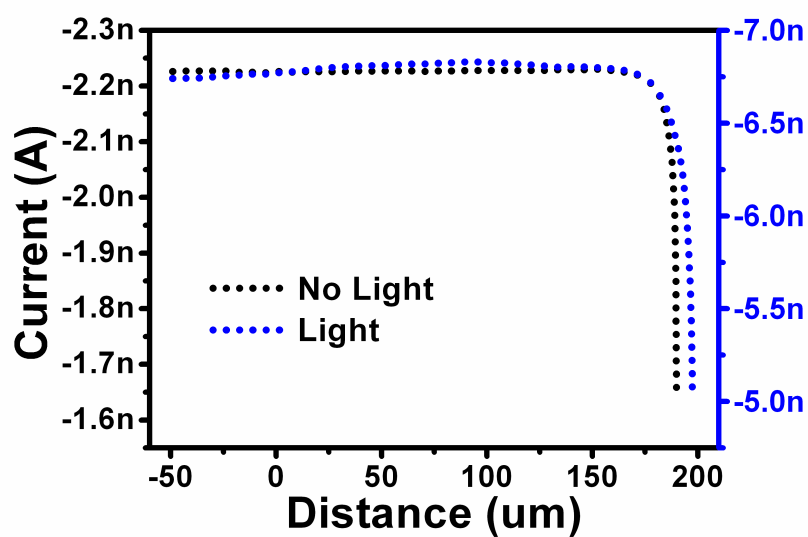

**Figure S1** The two approach curves after treatment (double Y model) which the starting current are on the same height level.

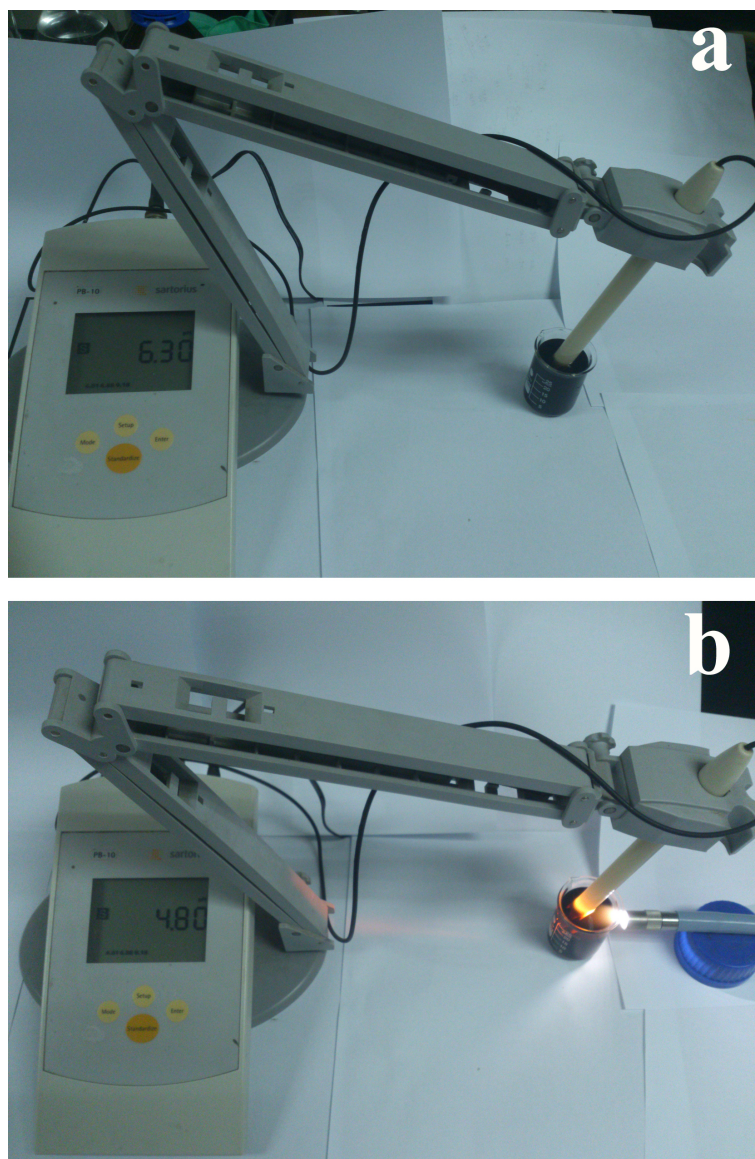

**Figure S2** The pH value of 5-10nm CQDs solution (a) without light irradiation or (b) under light irradiation (35°C, 100% illumination intensity )

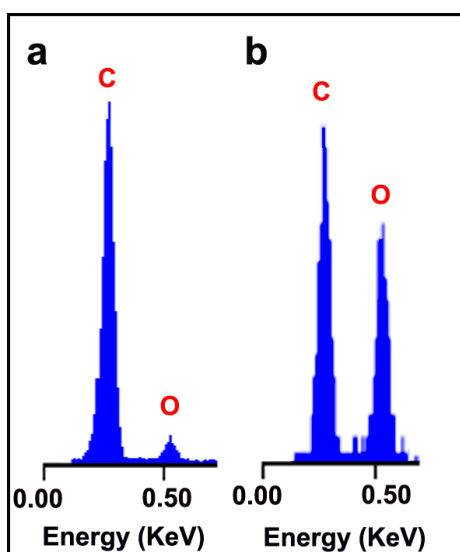

Figure S3 EDX spectra of 5-10nm CQDs (a) after chemical reduced and (b) without chemical reduced process.

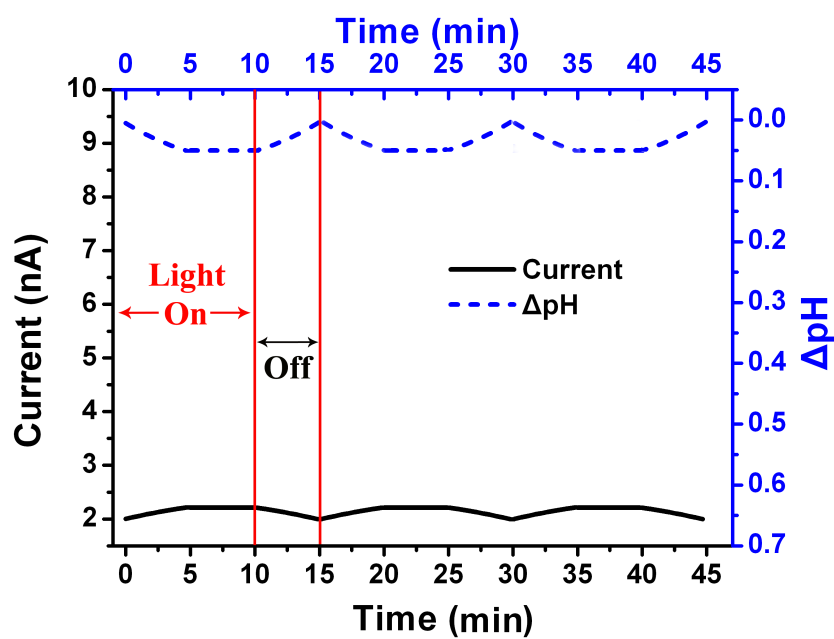

Figure S4 Photocurrent and pH value responses of 5-10 nm chemical reduced CQDs under visible light.

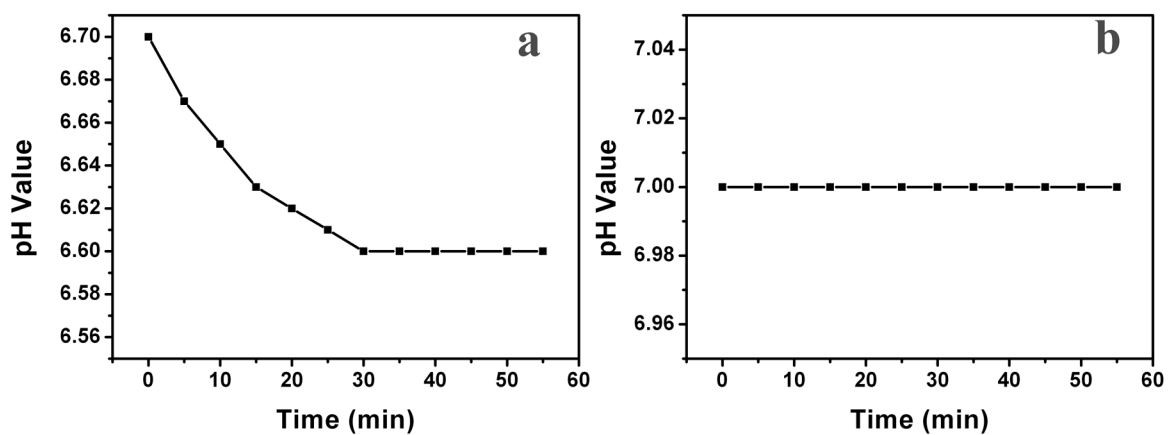

**Figure S5** The pH value's changes of (a) CQDs (1-4 nm) and (b) graphite solution (1mg/ml, 100% illumination, 25 °C) under visible light irradiation.

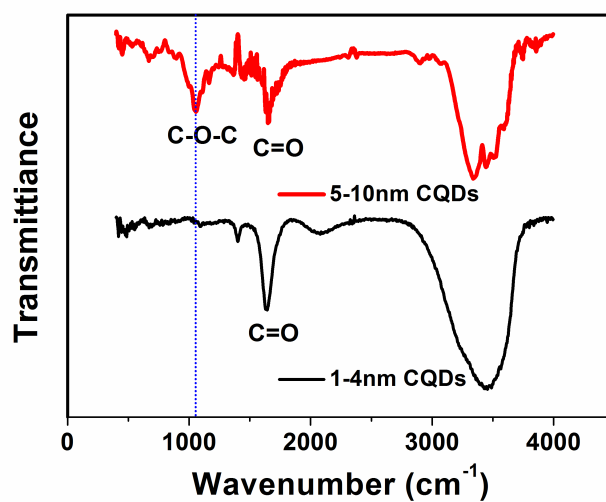

**Figure S6** The FT-IR spectra of 5-10nm CQDs and 1-4nm CQDs after visible light irradiation.

### The Stern-Volmer kinetic relationships:

This term applies broadly to variations of quantum yields of photophysical processes (e.g. fluorescence) or photochemical reactions (usually reaction quantum yield) with the concentration of a given reagent which may be a substrate or a quencher. In the simplest case, a plot of  $\phi^0/\phi$  (or  $M^0/M$  for emission) vs. concentration of quencher,  $[Q]$ , is linear obeying the equation:

$$\frac{\phi^0}{\phi} \text{ or } \frac{M^0}{M} = 1 + K_{sv} [Q] \quad (1)$$

In equation (1) is referred to as the Stern–Volmer constant. Equation (1) applies when a quencher inhibits either a photochemical reaction or a photophysical process by a single reaction.  $\phi^0$  and  $M^0$  are the quantum yield and emission intensity radiant exitance, respectively, in the absence of the quencher Q, while  $\phi$  and  $M$  are the same quantities in the presence of the different concentrations of Q. In the case of dynamic quenching the constant  $K_{sv}$  is the product of the true quenching constant  $k_q$  and the excited state lifetime,  $\tau^0$ , in the absence of quencher.  $k_q$  is the bimolecular reaction rate constant for the elementary reaction of the excited state with the particular quencher Q. Equation (1) can therefore be replaced by the expression (2):

$$\frac{\phi^0}{\phi} \text{ or } \frac{M^0}{M} = 1 + k_q \tau^0 [Q] \quad (2)$$

When an excited state undergoes a bimolecular reaction with rate constant  $k_T$  to form a product, a double-reciprocal relationship is observed according to the equation:

$$\frac{1}{\phi_p} = \left(1 + \frac{1}{k_T \tau^0 [S]}\right) \frac{1}{A \cdot B} \quad (3)$$

Where  $\phi_p$  is the quantum efficiency of product formation,  $A$  the efficiency of forming the reactive excited state,  $B$  the fraction of reactions of the excited state with substrate  $S$  which leads to product, and  $[S]$  is the concentration of reactive ground-state substrate. The intercept/slope ratio gives  $k_T \tau^0$ . If  $[S] = [Q]$ , and if a photophysical process is monitored, plots of equations (2) and (3) should provide independent determinations of the product-forming rate constant  $k_T$ . When the lifetime of an excited state is observed as a function of the concentration of  $S$  or  $Q$ , a linear relationship should be observed according to the equation:

$$\frac{\tau^0}{\tau} = 1 + k_q \tau^0 [Q]$$

Where  $\tau^0$  is the lifetime of the excited state in the absence of the quencher  $Q$ .

In the manuscript,  $\tau^0$  is  $\tau_F^0$ .
